# Supplementary material for: Detection of Jingmenviruses in Japan with Evidence of Vertical Transmission in Ticks
Source: MDPI journal article supplement (doi:10.3390/v13122547), 2021-12-19
Supplement: s1 [file s1]

Supplementary Table S1. List of tick pools used for retrospective screening of isolated viruses obtained in our previous study.

| No. | Pool no. | Species                          | No. of individuals |            |       |       | Collection date                          | Collection site                                           |
|-----|----------|----------------------------------|--------------------|------------|-------|-------|------------------------------------------|-----------------------------------------------------------|
|     |          |                                  | Adult female       | Adult male | Nymph | Larva |                                          |                                                           |
| 1   | T241     | <i>Haemaphysalis flava</i>       | 2                  | 1          | 15    |       | 20 January, 2014                         | Fukiage-cho, Hioki City, Kagoshima Prefecture, Japan      |
| 2   | T242     | <i>Haemaphysalis formosensis</i> |                    |            | 3     |       | 20 January, 2014                         | Fukiage-cho, Hioki City, Kagoshima Prefecture, Japan      |
| 3   | T243     | <i>Haemaphysalis flava</i>       |                    | 1          | 14    |       | 26 January, 2014                         | Odawara City, Kanagawa Prefecture, Japan                  |
| 4   | T244     | <i>Ixodes turdus</i>             | 1                  |            |       | 8     | 26 January, 2014                         | Odawara City, Kanagawa Prefecture, Japan                  |
| 5   | T245     | <i>Ixodes ovatus</i>             |                    | 1          |       |       | 21 July, 2013                            | Minokoshi, Mt. Tsurugi, Tokushima Prefecture, Japan       |
| 6   | T246     | <i>Haemaphysalis flava</i>       |                    |            | 1     |       | 3 September, 2013                        | Yoshino-cho, Ishinomaki City, Miyagi Prefecture, Japan    |
| 7   | T247     | <i>Haemaphysalis longicornis</i> | 1                  |            | 1     |       | 9 July and 3 September, 2013             | Yoshino-cho, Ishinomaki City, Miyagi Prefecture, Japan    |
| 8   | T248     | <i>Haemaphysalis longicornis</i> | 3                  |            | 2     |       | 10 July, 7 August, and 6 September, 2013 | Takata-cho, Rikuzentakata City, Iwate Prefecture, Japan   |
| 9   | T249     | <i>Haemaphysalis megaspinoso</i> |                    |            | 4     |       | 10 July, 2013                            | Takata-cho, Rikuzentakata City, Iwate Prefecture, Japan   |
| 10  | T250     | <i>Haemaphysalis flava</i>       |                    | 1          |       |       | 6 September, 2013                        | Takata-cho, Rikuzentakata City, Iwate Prefecture, Japan   |
| 11  | T251     | <i>Haemaphysalis megaspinoso</i> |                    |            | 3     |       | 7 August, 2013                           | Takata-cho, Rikuzentakata City, Iwate Prefecture, Japan   |
| 12  | T252     | <i>Haemaphysalis flava</i>       | 1                  |            | 10    |       | 30 October, 2013                         | Mt. Matsukira, Mino City, Gifu Prefecture, Japan          |
| 13  | T253     | <i>Haemaphysalis kitaokai</i>    | 2                  |            |       |       | 17 November, 2013                        | Shimobayashi-machi, Takayama City, Gifu Prefecture, Japan |
| 14  | T254     | <i>Haemaphysalis flava</i>       | 2                  | 3          | 29    |       | 7 June, 2013                             | Hachioji City, Tokyo, Japan                               |
| 15  | T255     | <i>Haemaphysalis longicornis</i> |                    |            | 1     |       | 15 June, 2013                            | Kanmami-cho, Shizuoka Prefecture, Japan                   |
| 16  | T256     | <i>Haemaphysalis longicornis</i> | 1                  |            | 14    |       | 24 May, 2013                             | Hachioji City, Tokyo, Japan                               |
| 17  | T257     | <i>Haemaphysalis flava</i>       | 1                  | 2          | 36    |       | 24 May, 2013                             | Hachioji City, Tokyo, Japan                               |
| 18  | T258     | <i>Haemaphysalis megaspinoso</i> | 1                  |            | 4     |       | 24 May, 2013                             | Hachioji City, Tokyo, Japan                               |
| 19  | T259     | <i>Haemaphysalis longicornis</i> | 1                  |            | 5     |       | 31 May, 2013                             | Hachioji City, Tokyo, Japan                               |
| 20  | T260     | <i>Haemaphysalis flava</i>       | 2                  | 2          | 26    |       | 26 May, 2013                             | Hachioji City, Tokyo, Japan                               |
| 21  | T261     | <i>Haemaphysalis longicornis</i> | 2                  |            | 18    |       | 7 June, 2013                             | Hachioji City, Tokyo, Japan                               |
| 22  | T262     | <i>Haemaphysalis longicornis</i> | 6                  |            | 21    |       | 24 and 28 June, 2013                     | Hachioji City, Tokyo, Japan                               |
| 23  | T263     | <i>Haemaphysalis flava</i>       |                    | 1          | 20    |       | 24 and 28 June, 2013                     | Hachioji City, Tokyo, Japan                               |
| 24  | T264     | <i>Haemaphysalis megaspinoso</i> | 1                  | 1          |       |       | 20 October, 2013                         | Hiroshima City, Hiroshima Prefecture, Japan               |
| 25  | T265     | <i>Haemaphysalis flava</i>       | 1                  |            | 4     |       | 16 November, 2013                        | Hiroshima City, Hiroshima Prefecture, Japan               |
| 26  | T266     | <i>Haemaphysalis kitaokai</i>    | 3                  |            |       |       | 2 and 16 November, 2013                  | Hiroshima City, Hiroshima Prefecture, Japan               |

|    |      |                                  |   |   |    |                                   |                                                      |
|----|------|----------------------------------|---|---|----|-----------------------------------|------------------------------------------------------|
| 27 | T267 | <i>Haemaphysalis megaspinosa</i> |   | 3 | 6  | 2 and 16 November, 2013           | Hiroshima City, Hiroshima Prefecture, Japan          |
| 28 | T268 | <i>Ixodes turdus</i>             |   |   | 1  | 25 January, 2014                  | Hiroshima City, Hiroshima Prefecture, Japan          |
| 29 | T269 | <i>Haemaphysalis flava</i>       | 2 | 3 | 22 | 12 and 19 October, 2013           | Yonago City and Yodoe-cho, Tottori Prefecture, Japan |
| 30 | T270 | <i>Amblyomma testudinarium</i>   |   |   | 1  | 19 October, 2013                  | Kiyomizu-cho, Yasugi City, Shimane Prefecture, Japan |
| 31 | T271 | <i>Haemaphysalis flava</i>       |   |   | 29 | 19 October, 2013                  | Kiyomizu-cho, Yasugi City, Shimane Prefecture, Japan |
| 32 | T272 | <i>Haemaphysalis megaspinosa</i> |   |   | 1  | 19 October, 2013                  | Kiyomizu-cho, Yasugi City, Shimane Prefecture, Japan |
| 33 | T273 | <i>Haemaphysalis flava</i>       |   |   | 20 | 10 September, 2013                | Tsubata-machi, Ishikawa Prefecture, Japan            |
| 34 | T274 | <i>Haemaphysalis flava</i>       | 5 | 9 | 11 | 17 October, 2013                  | Tsubata-machi, Ishikawa Prefecture, Japan            |
| 35 | T275 | <i>Haemaphysalis flava</i>       | 5 |   | 22 | 24 September and 2 November, 2013 | Wajima City, Ishikawa Prefecture, Japan              |
| 36 | T276 | <i>Haemaphysalis flava</i>       | 1 | 1 | 22 | 8 November, 2013                  | Soma City, Fukushima Prefecture, Japan               |
| 37 | T277 | <i>Haemaphysalis flava</i>       | 5 | 1 | 6  | 29 October, 2013                  | Nagaoka City, Niigata Prefecture, Japan              |
| 38 | T278 | <i>Haemaphysalis flava</i>       | 5 | 6 |    | 29 October, 2013                  | Kashiwazaki City, Niigata Prefecture, Japan          |
| 39 | T279 | <i>Haemaphysalis flava</i>       | 1 | 2 | 6  | 21 October, 2013                  | Nagano City, Nagano Prefecture, Japan                |
| 40 | T280 | <i>Haemaphysalis flava</i>       | 3 | 4 |    | 20 November, 2013                 | Tsushima City, Nagasaki Prefecture, Japan            |
| 41 | T281 | <i>Amblyomma testudinarium</i>   |   |   | 9  | 29 November, 2013                 | Tsushima City, Nagasaki Prefecture, Japan            |
| 42 | T282 | <i>Amblyomma testudinarium</i>   |   |   | 1  | 5 November, 2013                  | Tsushima City, Nagasaki Prefecture, Japan            |
| 43 | T283 | <i>Ixodes tanuki</i>             |   | 3 |    | 1 December, 2013                  | Tsushima City, Nagasaki Prefecture, Japan            |
| 44 | T284 | <i>Amblyomma testudinarium</i>   |   |   | 1  | 5 December, 2013                  | Tsushima City, Nagasaki Prefecture, Japan            |
| 45 | T285 | <i>Amblyomma testudinarium</i>   |   |   | 6  | 15 December, 2013                 | Tsushima City, Nagasaki Prefecture, Japan            |
| 46 | T286 | <i>Haemaphysalis megaspinosa</i> | 1 | 1 |    | 30 December, 2013                 | Tsushima City, Nagasaki Prefecture, Japan            |

Supplementary Table S2. List of primers used in this study.

| Virus              | Segment | Primer name   | Sequence (5'-3')         |
|--------------------|---------|---------------|--------------------------|
| Jingmen tick virus | 1       | JMTV-1F       | GAGAGAGGCAGAGAGGAATGGAT  |
|                    | 1       | JMTV-1R       | TTCTTGGTCTTCACTTGCCACTT  |
|                    | 1       | JMTV-s1-3GSP1 | GGCTCTKGCCATCCTCTCGGTAA  |
|                    | 1       | JMTV-s1-5GSP1 | ACCACTCCCCTGAACTTCATTCT  |
|                    | 2       | JMTV-2F       | GGCGGTTTCATCCTTTAACTGT   |
|                    | 2       | JMTV-2R       | AGGGACCACCCAGAACCTCCACT  |
|                    | 2       | JMTV-s2-3GSP1 | GACATTCTGAATGCGGAACGACAT |
|                    | 2       | JMTV-s2-5GSP1 | GCGAGAGCTGCGCGCGAAAGAAT  |
|                    | 3       | JMTV-3F       | GGCCCTGAGATGATACAAGGAGC  |
|                    | 3       | JMTV-3R       | GCTAGGGCGCCAGTGTTTGTCTT  |
|                    | 3       | JMTV-s3-3GSP1 | GTGGCTGAGCAGCGGGAGGAATA  |
|                    | 3       | JMTV-s3-5GSP1 | ATAGTGGGCAGCAGCTCCATGAA  |
|                    | 4       | JMTV-4F       | TTCGCAGGCACGTTTGTGATGGT  |
|                    | 4       | JMTV-4R       | GTGCGGTTACGCTACCTCCGCAA  |
|                    | 4       | JMTV-s4-3GSP1 | TACTACTACCTGATAGGAAGCAA  |
|                    | 4       | JMTV-s4-5GSP1 | CCTAGTCCATTGGTTGATTCTTA  |
| Takachi virus      | 1       | IMOI-Js1-F    | CGTGAAGTATGGAAGTGAGGAAC  |
|                    | 1       | IMOI-Js1-R    | CCCTTTGAGATGCCTTTTAAGTT  |
|                    | 1       | TAKV-s1-3GSP1 | ACCTGCTGTTGACACCAGACAAA  |
|                    | 1       | TAKV-s1-5GSP1 | TCGAGGGCTTGTCACCCGAGTAA  |
|                    | 2       | IMOI-Js2-F    | CCTACGAAAAAGCAATAGAGCAA  |
|                    | 2       | IMOI-Js2-R    | GACGTCTAAAAGCGGGTAAATCT  |
|                    | 2       | TAKV-s2-3GSP1 | GAACGACTACTAGACTGCGGAAA  |
|                    | 2       | TAKV-s2-5GSP1 | TTTCGTAGGACGATTGCGGCAAT  |
|                    | 3       | IMOI-Js3-F    | GAAACCTCATAATGGTGGCAATA  |
|                    | 3       | IMOI-Js3-R    | GGCTCATACCGCCTATTCTCTAT  |
|                    | 3       | TAKV-s3-3GSP1 | ACGACCAGGAACGGACCCGAAAA  |
|                    | 3       | TAKV-s3-5GSP1 | TGGTCGGCAGTAGCTCCATGAAA  |
|                    | 4       | IMOI-Js4-F    | TACTCTTCAGCCTGGCAGTTTAC  |
|                    | 4       | IMOI-Js4-R    | ACTGTCGTCTTCCATAGGTGGTA  |
|                    | 4       | TAKV-s4-3GSP1 | GGCAGCCGCATACGGAAGCGGAA  |
|                    | 4       | TAKV-s4-5GSP1 | ATGAGCAGGGTGAGGCCAGGTAT  |

Supplementary Table S3. Number of individuals of ticks used for RNA virome analyses in this study.

[illegible]

|                                              |    |      |      |      |    |     |     |     |     |    |
|----------------------------------------------|----|------|------|------|----|-----|-----|-----|-----|----|
|                                              | AM | 0    | 0    | 0    | 0  | 0   | 0   | 0   | 0   | 0  |
|                                              | N  | 0    | 0    | 0    | 0  | 0   | 0   | 0   | 2   | 2  |
|                                              | L  | 0    | 0    | 0    | 0  | 0   | 0   | 0   | 0   | 0  |
| <i>I. persulcatus</i>                        | AF | 0    | 0    | 0    | 0  | 0   | 0   | 0   | 0   | 0  |
|                                              | AM | 0    | 0    | 0    | 0  | 0   | 0   | 0   | 0   | 0  |
|                                              | N  | 0    | 0    | 0    | 0  | 0   | 1   | 0   | 0   | 1  |
|                                              | L  | 0    | 0    | 0    | 0  | 0   | 0   | 0   | 0   | 0  |
| <i>I. turdus</i>                             | AF | 0    | 0    | 2    | 0  | 0   | 0   | 0   | 0   | 2  |
|                                              | AM | 0    | 0    | 0    | 0  | 0   | 0   | 0   | 0   | 0  |
|                                              | N  | 0    | 1    | 33   | 0  | 0   | 0   | 0   | 1   | 35 |
|                                              | L  | 0    | 11   | 0    | 0  | 0   | 0   | 0   | 0   | 11 |
| Total no. of individuals per collection site |    | 1068 | 1723 | 1475 | 69 | 107 | 101 | 200 | 265 |    |

\*Adult female (AF), Adult male (AM), Nymph (N), and Larva (L).
